# Supplementary material
Source: MDPI journal article supplement (https://www.mdpi.com/2304-6740/7/12/143)
Supplement: s1 [file s1]

Archive with 52 entries (52 files):
- BiI3_10.7GPa.cif
- BiI3_10.7GPa_checkcif.pdf
- BiI3_11.6GPa.cif
- BiI3_11.6GPa_checkcif.pdf
- BiI3_12.3GPa.cif
- BiI3_12.3GPa_checkcif.pdf
- BiI3_13.9GPa.cif
- BiI3_13.9GPa_checkcif.pdf
- BiI3_14.6GPa.cif
- BiI3_14.6GPa_checkcif.pdf
- BiI3_15.8GPa.cif
- BiI3_15.8GPa_checkcif.pdf
- BiI3_17.2GPa.cif
- BiI3_17.2GPa_checkcif.pdf
- BiI3_18.1GPa.cif
- BiI3_18.1GPa_checkcif.pdf
- BiI3_19.2GPa.cif
- BiI3_19.2GPa_checkcif.pdf
- BiI3_20.2GPa.cif
- BiI3_20.2GPa_checkcif.pdf
- BiI3_21.3GPa.cif
- BiI3_21.3GPa_checkcif.pdf
- BiI3_22.3GPa.cif
- BiI3_22.3GPa_checkcif.pdf
- BiI3_23.2GPa.cif
- BiI3_23.2GPa_checkcif.pdf
- BiI3_24.3GPa.cif
- BiI3_24.3GPa_checkcif.pdf
- BiI3_25.5GPa.cif
- BiI3_25.5GPa_checkcif.pdf
- BiI3_26.6GPa.cif
- BiI3_26.6GPa_checkcif.pdf
- BiI3_28GPa.cif
- BiI3_28GPa_checkcif.pdf
- BiI3_29.3GPa.cif
- BiI3_29.3GPa_checkcif.pdf
- BiI3_30.9GPa.cif
- BiI3_30.9GPa_checkcif.pdf
- BiI3_32.4GPa.cif
- BiI3_32.4GPa_checkcif.pdf
- BiI3_35.1GPa.cif
- BiI3_35.1GPa_checkcif.pdf
- BiI3_37GPa.cif
- BiI3_37GPa_checkcif.pdf
- BiI3_39.8GPa.cif
- BiI3_39.8GPa_checkcif.pdf
- BiI3_7.46GPa.cif
- BiI3_7.46GPa_checkcif.pdf
- BiI3_8.6GPa.cif
- BiI3_8.6GPa_checkcif.pdf
- BiI3_9.83GPa.cif
- BiI3_9.83GPa_checkcif.pdf
