# Supplementary material
Source: MDPI journal article supplement (https://www.mdpi.com/2304-6740/7/12/143)
Supplement: s1 [file s1 › BiI3_7.46GPa.cif]

#------------------ SECTION 1. GLOBAL INFORMATION ---------------------------#

data_BiI3-hs3112030

#------------------ SUBMISSION DETAILS --------------------------------------#

_publ_contact_author_name          ?
_publ_contact_author_address       ?
_publ_contact_author_email         ?
_publ_contact_author_fax           ?
_publ_contact_author_phone         ?
_publ_requested_journal            ?

#------------------  SECTION 2. COMPOUND(S) DETAILS -------------------------#

_audit_creation_date              ?
_audit_creation_method            'WinCSD program'

#------------------ CHEMICAL INFORMATION ------------------------------------#

_chemical_formula_sum             'BiI3'
_chemical_formula_weight          589.67
_chemical_melting_point           ?
_chemical_compound_source         ?

loop_
_atom_type_symbol
_atom_type_description
_atom_type_number_in_cell
_atom_type_scat_dispersion_real
_atom_type_scat_dispersion_imag
_atom_type_scat_source
Bi    Bi        4.00     .000    4.429 WinCSD
I     I        12.00     .000     .687 WinCSD

#------------------ UNIT CELL INFORMATION -----------------------------------#

loop_
_symmetry_equiv_pos_as_xyz
' x, y, z'
'-x, y, z'
' x, -y, 1/2+z'
'-x, -y, 1/2+z'
'-x, -y, -z'
' x, -y, -z'
'-x, y, 1/2-z'
' x, y, 1/2-z'
' 1/2+x, 1/2+y, z'
' 1/2-x, 1/2+y, z'
' 1/2+x, 1/2-y, 1/2+z'
' 1/2-x, 1/2-y, 1/2+z'
' 1/2-x, 1/2-y, -z'
' 1/2+x, 1/2-y, -z'
' 1/2-x, 1/2+y, 1/2-z'
' 1/2+x, 1/2+y, 1/2-z'

_symmetry_cell_setting            orthorhombic
_symmetry_space_group_name_H-M    'C m c m'

_cell_length_a                    4.044(2)
_cell_length_b                    12.796(7)
_cell_length_c                    9.493(4)
_cell_angle_alpha                 90
_cell_angle_beta                  90
_cell_angle_gamma                 90
_cell_volume                      491.3(6)
_cell_formula_units_Z             4


#------------------ CRYSTAL INFORMATION -------------------------------------#

_pd_spec_size_axial               25 # mm
_pd_spec_size_equat               25 # mm
_pd_spec_size_thick               1  # mm

_pd_spec_mounting                 'packed powder pellet'
_pd_spec_mount_mode               ?
_pd_spec_shape                    ?
_pd_char_particle_morphology      ?
_pd_char_colour                   ?

#_pd_prep_conditions               ?
#_pd_prep_cool_rate                ? # K/min
#_pd_prep_pressure                 '7 460 000 kPa'
#_pd_prep_temperature              '295 K'

_exptl_crystal_density_meas       ?
_exptl_crystal_density_diffrn     7.9707
_exptl_crystal_density_method     ?
_exptl_crystal_F_000              968
_exptl_absorpt_coefficient_mu     14.92
_exptl_crystal_description	  'black powder'


#------------------ DATA COLLECTION INFORMATION -----------------------------#

_cell_measurement_temperature          295.0
_cell_measurement_reflns_used          ?
_cell_measurement_theta_min            ?
_cell_measurement_theta_max            ?

_diffrn_ambient_temperature            295.0
_diffrn_ambient_pressure	       ?
_diffrn_measurement_device_type        'ID09 ESRF'
_diffrn_source_power                   ?
_diffrn_source_voltage                 ?
_diffrn_source_current                 ?
_diffrn_radiation_source               'synchrotron ESRF'
_diffrn_radiation_detector             ?
_diffrn_radiation_monochromator   ?
_diffrn_radiation_probe                x-ray

_diffrn_radiation_wavelength      0.413121
_diffrn_radiation_type            synchrotron

_diffrn_reflns_number             ?

_diffrn_reflns_limit_h_min           0
_diffrn_reflns_limit_h_max           4
_diffrn_reflns_limit_k_min           0
_diffrn_reflns_limit_k_max           12
_diffrn_reflns_limit_l_min           0
_diffrn_reflns_limit_l_max           9
_diffrn_reflns_theta_min          ?
_diffrn_reflns_theta_max          12.2


#------------------ COMPUTER PROGRAMS USED ----------------------------------#

_computing_data_collection        ?
_computing_cell_refinement        'WinCSD'
_computing_data_reduction         'WinCSD'
_computing_structure_solution     'WinCSD'
_computing_structure_refinement   'WinCSD'
_computing_molecular_graphics     ?
_computing_publication_material   'WinCSD (Akselrud et al, 1993)'

#### PLEASE do not forget the following reference :
#L. Akselrud, Yu. Grin.
#WinCSD: software package for crystallographic calculations (Version 4).
#J. Appl. Crystallogr., 2014, 47.

#------------------ REFINEMENT INFORMATION ----------------------------------#

# Use this field to give any special details about
# about the processing of the powder pattern
_pd_proc_ls_special_details
; ?
;

# The next two items are given as text
_pd_proc_ls_profile_function      pseudo-Voigt
_pd_proc_ls_pref_orient_corr
; Preffered orientation was refined using WinCSD
formula (Pecharskii, Akselrud & Zavalii, 1987):

I~corr~=I~obs~/[1+(\t^2^-1)^.^sin^2^\f]^1/2^

'Axis'  1  0  0, \t=0.41(2)

;

#PLEASE do not forget the following reference :
#L. Akselrud, Yu. Grin.
#J. Appl. Crystallogr., 2014, 47.

#------------------------- EXPERIMENTAL DATA --------------------------------#
_pd_meas_scan_method               step
_pd_meas_2theta_range_min         2.01
_pd_meas_2theta_range_max         24.0
_pd_meas_2theta_range_inc         0.01
 
#------------------------- REFINEMENT INFORMATION ---------------------------#
 
_pd_proc_ls_prof_R_factor         0.0288
_pd_proc_ls_prof_wR_factor        0.0429
_pd_proc_ls_prof_wR_expected      0.0321
 

_refine_special_details
; ?
;

_refine_ls_structure_factor_coef  Inet
_refine_ls_matrix_type            fullcycle

_refine_ls_weighting_scheme       'calc'
_refine_ls_weighting_details      '1/[Y~i~+\s(Y~i~)]'
_refine_ls_hydrogen_treatment     ?
_refine_ls_extinction_method      ?
_refine_ls_extinction_coef        ?
_refine_ls_abs_structure_details  ?
_refine_ls_abs_structure_Flack    ?
_refine_ls_number_reflns          162
_refine_ls_number_parameters      7
_refine_ls_number_restraints      ?
_refine_ls_number_constraints     ?
_refine_ls_restrained_S_all       ?
_refine_ls_restrained_S_obs       ?
_refine_ls_shift/su_max           ?
_refine_ls_shift/su_mean          ?  


_refine_diff_density_max          ?
_refine_diff_density_min          ?

#------------------ ATOMIC TYPES, COORDINATES AND THERMAL PARAMETERS --------#

loop_
_atom_site_label
_atom_site_type_symbol
_atom_site_fract_x
_atom_site_fract_y
_atom_site_fract_z
_atom_site_thermal_displace_type
_atom_site_U_iso_or_equiv
_atom_site_symmetry_multiplicity
_atom_site_occupancy
Bi   Bi  0          0.737(1)   0.25       Uovl 0.00        4       1.0
I1   I   0          0.060(2)   0.25       Uovl 0.00        4       1.0
I2   I   0          0.632(1)   0.563(2)   Uovl 0.00        8       1.0


loop_
_geom_bond_atom_site_label_1
_geom_bond_atom_site_label_2
_geom_bond_distance
_geom_bond_site_symmetry_2
_geom_bond_publ_flag
Bi      I1       3.04(2)      9_555   yes
Bi      I1       3.04(2)      9_455   yes
Bi      I2       3.159(13)   11_564   yes
Bi      I2       3.159(13)   11_464   yes
Bi      I2       3.159(13)   13_566   yes
Bi      I2       3.159(13)   13_466   yes
Bi      I2       3.264(15)     .      yes
Bi      I2       3.264(15)    7_555   yes
Bi      Bi       4.045(1)     1_455   yes
Bi      Bi       4.045(1)     1_655   yes
Bi      I1       4.13(3)      1_565   yes
I1      I2       3.65(2)     11_554   yes
I1      I2       3.65(2)     11_454   yes
I1      I2       3.65(2)     13_556   yes
I1      I2       3.65(2)     13_456   yes
I1      I2       3.715(13)    9_545   yes
I1      I2       3.715(13)    9_445   yes
I1      I2       3.715(13)   15_545   yes
I1      I2       3.715(13)   15_445   yes
I1      I1       4.045(1)     1_655   yes
I1      I1       4.045(1)     1_455   yes
I1      I2       4.31(2)      3_564   yes
I1      I2       4.31(2)      5_566   yes
I2      I2       3.54(2)      7_556   yes
I2      I2       3.60(2)      5_566   yes
I2      I2       3.81(2)     13_566   yes
I2      I2       3.81(2)     13_466   yes
I2      I2       4.045(1)     1_655   yes
I2      I2       4.045(1)     1_455   yes

loop_
_geom_angle_atom_site_label_1
_geom_angle_atom_site_label_2
_geom_angle_atom_site_label_3
_geom_angle
_geom_angle_site_symmetry_1
_geom_angle_site_symmetry_2
_geom_angle_site_symmetry_3
_geom_angle_publ_flag
I1      Bi      I1        83.41(4)    9_555    .      9_455  yes
I1      Bi      I2        88.06(4)    9_555    .     11_564  yes
I1      Bi      I2       144.87(5)    9_555    .     11_464  yes
I1      Bi      I2        88.06(4)    9_555    .     13_566  yes
I1      Bi      I2       144.87(5)    9_555    .     13_466  yes
I1      Bi      I2        72.11(4)    9_555    .       .     yes
I1      Bi      I2        72.11(4)    9_555    .      7_555  yes
I1      Bi      Bi       131.70(4)    9_555    .      1_455  yes
I1      Bi      Bi        48.30(3)    9_555    .      1_655  yes
I1      Bi      I1       138.30(4)    9_555    .      1_565  yes
I1      Bi      I2       144.87(5)    9_455    .     11_564  yes
I1      Bi      I2        88.06(4)    9_455    .     11_464  yes
I1      Bi      I2       144.87(5)    9_455    .     13_566  yes
I1      Bi      I2        88.06(4)    9_455    .     13_466  yes
I1      Bi      I2        72.11(4)    9_455    .       .     yes
I1      Bi      I2        72.11(4)    9_455    .      7_555  yes
I1      Bi      Bi        48.30(3)    9_455    .      1_455  yes
I1      Bi      Bi       131.70(4)    9_455    .      1_655  yes
I1      Bi      I1       138.30(4)    9_455    .      1_565  yes
I2      Bi      I2        79.61(4)   11_564    .     11_464  yes
I2      Bi      I2        68.22(4)   11_564    .     13_566  yes
I2      Bi      I2       116.66(4)   11_564    .     13_466  yes
I2      Bi      I2       136.65(4)   11_564    .       .     yes
I2      Bi      I2        72.83(4)   11_564    .      7_555  yes
I2      Bi      Bi       129.80(4)   11_564    .      1_455  yes
I2      Bi      Bi        50.20(3)   11_564    .      1_655  yes
I2      Bi      I1        58.33(3)   11_564    .      1_565  yes
I2      Bi      I2       116.66(4)   11_464    .     13_566  yes
I2      Bi      I2        68.22(4)   11_464    .     13_466  yes
I2      Bi      I2       136.65(4)   11_464    .       .     yes
I2      Bi      I2        72.83(4)   11_464    .      7_555  yes
I2      Bi      Bi        50.20(3)   11_464    .      1_455  yes
I2      Bi      Bi       129.80(4)   11_464    .      1_655  yes
I2      Bi      I1        58.33(3)   11_464    .      1_565  yes
I2      Bi      I2        79.61(4)   13_566    .     13_466  yes
I2      Bi      I2        72.83(4)   13_566    .       .     yes
I2      Bi      I2       136.65(4)   13_566    .      7_555  yes
I2      Bi      Bi       129.80(4)   13_566    .      1_455  yes
I2      Bi      Bi        50.20(3)   13_566    .      1_655  yes
I2      Bi      I1        58.33(3)   13_566    .      1_565  yes
I2      Bi      I2        72.83(4)   13_466    .       .     yes
I2      Bi      I2       136.65(4)   13_466    .      7_555  yes
I2      Bi      Bi        50.20(3)   13_466    .      1_455  yes
I2      Bi      Bi       129.80(4)   13_466    .      1_655  yes
I2      Bi      I1        58.33(3)   13_466    .      1_565  yes
I2      Bi      I2       131.42(4)     .       .      7_555  yes
I2      Bi      Bi        90.00(3)     .       .      1_455  yes
I2      Bi      Bi        90.00(3)     .       .      1_655  yes
I2      Bi      I1       114.29(4)     .       .      1_565  yes
I2      Bi      Bi        90.00(3)    7_555    .      1_455  yes
I2      Bi      Bi        90.00(3)    7_555    .      1_655  yes
I2      Bi      I1       114.29(4)    7_555    .      1_565  yes
Bi      Bi      Bi       180.00(3)    1_455    .      1_655  yes
Bi      Bi      I1        90.00(3)    1_455    .      1_565  yes
Bi      Bi      I1        90.00(3)    1_655    .      1_565  yes
Bi      I1      Bi        83.41(4)    9_545    .      9_445  yes
Bi      I1      I2        97.85(4)    9_545    .     11_554  yes
Bi      I1      I2       150.88(5)    9_545    .     11_454  yes
Bi      I1      I2        97.85(4)    9_545    .     13_556  yes
Bi      I1      I2       150.88(5)    9_545    .     13_456  yes
Bi      I1      I2        56.74(3)    9_545    .      9_545  yes
Bi      I1      I2       100.13(4)    9_545    .      9_445  yes
Bi      I1      I2        56.74(3)    9_545    .     15_545  yes
Bi      I1      I2       100.13(4)    9_545    .     15_445  yes
Bi      I1      I1        48.30(3)    9_545    .      1_655  yes
Bi      I1      I1       131.70(5)    9_545    .      1_455  yes
Bi      I1      Bi       138.30(4)    9_545    .      1_545  yes
Bi      I1      I2        47.11(3)    9_545    .      3_564  yes
Bi      I1      I2        47.11(3)    9_545    .      5_566  yes
Bi      I1      I2       150.88(5)    9_445    .     11_554  yes
Bi      I1      I2        97.85(4)    9_445    .     11_454  yes
Bi      I1      I2       150.88(5)    9_445    .     13_556  yes
Bi      I1      I2        97.85(4)    9_445    .     13_456  yes
Bi      I1      I2       100.13(4)    9_445    .      9_545  yes
Bi      I1      I2        56.74(3)    9_445    .      9_445  yes
Bi      I1      I2       100.13(4)    9_445    .     15_545  yes
Bi      I1      I2        56.74(3)    9_445    .     15_445  yes
Bi      I1      I1       131.70(5)    9_445    .      1_655  yes
Bi      I1      I1        48.30(3)    9_445    .      1_455  yes
Bi      I1      Bi       138.30(4)    9_445    .      1_545  yes
Bi      I1      I2        47.11(3)    9_445    .      3_564  yes
Bi      I1      I2        47.11(3)    9_445    .      5_566  yes
I2      I1      I2        67.27(3)   11_554    .     11_454  yes
I2      I1      I2        58.06(3)   11_554    .     13_556  yes
I2      I1      I2        94.85(4)   11_554    .     13_456  yes
I2      I1      I2       104.82(4)   11_554    .      9_545  yes
I2      I1      I2       149.20(5)   11_554    .      9_445  yes
I2      I1      I2        58.57(3)   11_554    .     15_545  yes
I2      I1      I2        94.69(4)   11_554    .     15_445  yes
I2      I1      I1        56.36(3)   11_554    .      1_655  yes
I2      I1      I1       123.64(4)   11_554    .      1_455  yes
I2      I1      Bi        47.43(3)   11_554    .      1_545  yes
I2      I1      I2       114.66(4)   11_554    .      3_564  yes
I2      I1      I2       144.71(4)   11_554    .      5_566  yes
I2      I1      I2        94.85(4)   11_454    .     13_556  yes
I2      I1      I2        58.06(3)   11_454    .     13_456  yes
I2      I1      I2       149.20(5)   11_454    .      9_545  yes
I2      I1      I2       104.82(4)   11_454    .      9_445  yes
I2      I1      I2        94.69(4)   11_454    .     15_545  yes
I2      I1      I2        58.57(3)   11_454    .     15_445  yes
I2      I1      I1       123.64(4)   11_454    .      1_655  yes
I2      I1      I1        56.36(3)   11_454    .      1_455  yes
I2      I1      Bi        47.43(3)   11_454    .      1_545  yes
I2      I1      I2       114.66(4)   11_454    .      3_564  yes
I2      I1      I2       144.71(4)   11_454    .      5_566  yes
I2      I1      I2        67.27(3)   13_556    .     13_456  yes
I2      I1      I2        58.57(3)   13_556    .      9_545  yes
I2      I1      I2        94.69(4)   13_556    .      9_445  yes
I2      I1      I2       104.82(4)   13_556    .     15_545  yes
I2      I1      I2       149.20(5)   13_556    .     15_445  yes
I2      I1      I1        56.36(3)   13_556    .      1_655  yes
I2      I1      I1       123.64(4)   13_556    .      1_455  yes
I2      I1      Bi        47.43(3)   13_556    .      1_545  yes
I2      I1      I2       144.71(4)   13_556    .      3_564  yes
I2      I1      I2       114.66(4)   13_556    .      5_566  yes
I2      I1      I2        94.69(4)   13_456    .      9_545  yes
I2      I1      I2        58.57(3)   13_456    .      9_445  yes
I2      I1      I2       149.20(5)   13_456    .     15_545  yes
I2      I1      I2       104.82(4)   13_456    .     15_445  yes
I2      I1      I1       123.64(4)   13_456    .      1_655  yes
I2      I1      I1        56.36(3)   13_456    .      1_455  yes
I2      I1      Bi        47.43(3)   13_456    .      1_545  yes
I2      I1      I2       144.71(4)   13_456    .      3_564  yes
I2      I1      I2       114.66(4)   13_456    .      5_566  yes
I2      I1      I2        65.96(3)    9_545    .      9_445  yes
I2      I1      I2       106.43(4)    9_545    .     15_545  yes
I2      I1      I2       151.11(5)    9_545    .     15_445  yes
I2      I1      I1        57.02(3)    9_545    .      1_655  yes
I2      I1      I1       122.98(4)    9_545    .      1_455  yes
I2      I1      Bi       104.44(4)    9_545    .      1_545  yes
I2      I1      I2        95.85(4)    9_545    .      3_564  yes
I2      I1      I2        56.18(3)    9_545    .      5_566  yes
I2      I1      I2       151.11(5)    9_445    .     15_545  yes
I2      I1      I2       106.43(4)    9_445    .     15_445  yes
I2      I1      I1       122.98(4)    9_445    .      1_655  yes
I2      I1      I1        57.02(3)    9_445    .      1_455  yes
I2      I1      Bi       104.44(4)    9_445    .      1_545  yes
I2      I1      I2        95.85(4)    9_445    .      3_564  yes
I2      I1      I2        56.18(3)    9_445    .      5_566  yes
I2      I1      I2        65.96(3)   15_545    .     15_445  yes
I2      I1      I1        57.02(3)   15_545    .      1_655  yes
I2      I1      I1       122.98(4)   15_545    .      1_455  yes
I2      I1      Bi       104.44(4)   15_545    .      1_545  yes
I2      I1      I2        56.18(3)   15_545    .      3_564  yes
I2      I1      I2        95.85(4)   15_545    .      5_566  yes
I2      I1      I1       122.98(4)   15_445    .      1_655  yes
I2      I1      I1        57.02(3)   15_445    .      1_455  yes
I2      I1      Bi       104.44(4)   15_445    .      1_545  yes
I2      I1      I2        56.18(3)   15_445    .      3_564  yes
I2      I1      I2        95.85(4)   15_445    .      5_566  yes
I1      I1      I1       180.00(4)    1_655    .      1_455  yes
I1      I1      Bi        90.00(3)    1_655    .      1_545  yes
I1      I1      I2        90.00(3)    1_655    .      3_564  yes
I1      I1      I2        90.00(3)    1_655    .      5_566  yes
I1      I1      Bi        90.00(3)    1_455    .      1_545  yes
I1      I1      I2        90.00(3)    1_455    .      3_564  yes
I1      I1      I2        90.00(3)    1_455    .      5_566  yes
Bi      I1      I2       155.72(4)    1_545    .      3_564  yes
Bi      I1      I2       155.72(4)    1_545    .      5_566  yes
I2      I1      I2        48.55(3)    3_564    .      5_566  yes
Bi      I2      Bi        79.61(4)   11_565    .     11_465  yes
Bi      I2      Bi       107.17(4)   11_565    .       .     yes
Bi      I2      I2        55.89(3)   11_565    .      7_556  yes
Bi      I2      I2       133.02(5)   11_565    .      5_566  yes
Bi      I2      I1        74.25(4)   11_565    .     11_555  yes
Bi      I2      I1       115.96(4)   11_565    .     11_455  yes
Bi      I2      I1       103.39(4)   11_565    .      9_555  yes
Bi      I2      I1       158.22(5)   11_565    .      9_455  yes
Bi      I2      I2        54.86(3)   11_565    .     13_566  yes
Bi      I2      I2        95.93(4)   11_565    .     13_466  yes
Bi      I2      I2        50.20(3)   11_565    .      1_655  yes
Bi      I2      I2       129.80(4)   11_565    .      1_455  yes
Bi      I2      I1        44.83(3)   11_565    .      3_565  yes
Bi      I2      Bi       107.17(4)   11_465    .       .     yes
Bi      I2      I2        55.89(3)   11_465    .      7_556  yes
Bi      I2      I2       133.02(5)   11_465    .      5_566  yes
Bi      I2      I1       115.96(4)   11_465    .     11_555  yes
Bi      I2      I1        74.25(4)   11_465    .     11_455  yes
Bi      I2      I1       158.22(5)   11_465    .      9_555  yes
Bi      I2      I1       103.39(4)   11_465    .      9_455  yes
Bi      I2      I2        95.93(4)   11_465    .     13_566  yes
Bi      I2      I2        54.86(3)   11_465    .     13_466  yes
Bi      I2      I2       129.80(4)   11_465    .      1_655  yes
Bi      I2      I2        50.20(3)   11_465    .      1_455  yes
Bi      I2      I1        44.83(3)   11_465    .      3_565  yes
Bi      I2      I2       155.71(5)     .       .      7_556  yes
Bi      I2      I2        94.78(4)     .       .      5_566  yes
Bi      I2      I1       136.10(4)     .       .     11_555  yes
Bi      I2      I1       136.10(4)     .       .     11_455  yes
Bi      I2      I1        51.14(3)     .       .      9_555  yes
Bi      I2      I1        51.14(3)     .       .      9_455  yes
Bi      I2      I2        52.31(3)     .       .     13_566  yes
Bi      I2      I2        52.31(3)     .       .     13_466  yes
Bi      I2      I2        90.00(4)     .       .      1_655  yes
Bi      I2      I2        90.00(4)     .       .      1_455  yes
Bi      I2      I1        89.98(4)     .       .      3_565  yes
I2      I2      I2       109.51(4)    7_556    .      5_566  yes
I2      I2      I1        60.97(3)    7_556    .     11_555  yes
I2      I2      I1        60.97(3)    7_556    .     11_455  yes
I2      I2      I1       143.22(4)    7_556    .      9_555  yes
I2      I2      I1       143.22(4)    7_556    .      9_455  yes
I2      I2      I2       108.40(4)    7_556    .     13_566  yes
I2      I2      I2       108.40(4)    7_556    .     13_466  yes
I2      I2      I2        90.00(4)    7_556    .      1_655  yes
I2      I2      I2        90.00(4)    7_556    .      1_455  yes
I2      I2      I1        65.72(3)    7_556    .      3_565  yes
I2      I2      I1        61.60(3)    5_566    .     11_555  yes
I2      I2      I1        61.60(3)    5_566    .     11_455  yes
I2      I2      I1        59.83(3)    5_566    .      9_555  yes
I2      I2      I1        59.83(3)    5_566    .      9_455  yes
I2      I2      I2       129.52(4)    5_566    .     13_566  yes
I2      I2      I2       129.52(4)    5_566    .     13_466  yes
I2      I2      I2        90.00(4)    5_566    .      1_655  yes
I2      I2      I2        90.00(4)    5_566    .      1_455  yes
I2      I2      I1       175.24(4)    5_566    .      3_565  yes
I1      I2      I1        67.27(3)   11_555    .     11_455  yes
I1      I2      I1        85.31(4)   11_555    .      9_555  yes
I1      I2      I1       121.43(4)   11_555    .      9_455  yes
I1      I2      I2       113.07(4)   11_555    .     13_566  yes
I1      I2      I2       168.30(5)   11_555    .     13_466  yes
I1      I2      I2        56.36(3)   11_555    .      1_655  yes
I1      I2      I2       123.64(4)   11_555    .      1_455  yes
I1      I2      I1       114.66(4)   11_555    .      3_565  yes
I1      I2      I1       121.43(4)   11_455    .      9_555  yes
I1      I2      I1        85.31(4)   11_455    .      9_455  yes
I1      I2      I2       168.30(5)   11_455    .     13_566  yes
I1      I2      I2       113.07(4)   11_455    .     13_466  yes
I1      I2      I2       123.64(4)   11_455    .      1_655  yes
I1      I2      I2        56.36(3)   11_455    .      1_455  yes
I1      I2      I1       114.66(4)   11_455    .      3_565  yes
I1      I2      I1        65.96(3)    9_555    .      9_455  yes
I1      I2      I2        69.81(3)    9_555    .     13_566  yes
I1      I2      I2       103.43(4)    9_555    .     13_466  yes
I1      I2      I2        57.02(3)    9_555    .      1_655  yes
I1      I2      I2       122.98(4)    9_555    .      1_455  yes
I1      I2      I1       123.82(4)    9_555    .      3_565  yes
I1      I2      I2       103.43(4)    9_455    .     13_566  yes
I1      I2      I2        69.81(3)    9_455    .     13_466  yes
I1      I2      I2       122.98(4)    9_455    .      1_655  yes
I1      I2      I2        57.02(3)    9_455    .      1_455  yes
I1      I2      I1       123.82(4)    9_455    .      3_565  yes
I2      I2      I2        64.04(3)   13_566    .     13_466  yes
I2      I2      I2        57.98(3)   13_566    .      1_655  yes
I2      I2      I2       122.02(4)   13_566    .      1_455  yes
I2      I2      I1        54.01(3)   13_566    .      3_565  yes
I2      I2      I2       122.02(4)   13_466    .      1_655  yes
I2      I2      I2        57.98(3)   13_466    .      1_455  yes
I2      I2      I1        54.01(3)   13_466    .      3_565  yes
I2      I2      I2       180.00(4)    1_655    .      1_455  yes
I2      I2      I1        90.00(3)    1_655    .      3_565  yes
I2      I2      I1        90.00(3)    1_455    .      3_565  yes
