# Supplementary material
Source: MDPI journal article supplement (https://www.mdpi.com/2304-6740/7/12/143)
Supplement: s1 [file s1 › BiI3_19.2GPa.cif]

#------------------ SECTION 1. GLOBAL INFORMATION ---------------------------#

data_BiI3-hs3112043

#------------------ SUBMISSION DETAILS --------------------------------------#

_publ_contact_author_name          ?
_publ_contact_author_address       ?
_publ_contact_author_email         ?
_publ_contact_author_fax           ?
_publ_contact_author_phone         ?
_publ_requested_journal            ?

#------------------  SECTION 2. COMPOUND(S) DETAILS -------------------------#

_audit_creation_date              ?
_audit_creation_method            'WinCSD program'

#------------------ CHEMICAL INFORMATION ------------------------------------#

_chemical_formula_sum             'BiI3'
_chemical_formula_weight          589.67
_chemical_melting_point           ?
_chemical_compound_source         ?

loop_
_atom_type_symbol
_atom_type_description
_atom_type_number_in_cell
_atom_type_scat_dispersion_real
_atom_type_scat_dispersion_imag
_atom_type_scat_source
Bi    Bi        4.00    -.577    4.429 WinCSD
I     I        12.00   -1.906     .687 WinCSD

#------------------ UNIT CELL INFORMATION -----------------------------------#

loop_
_symmetry_equiv_pos_as_xyz
' x, y, z'
'-x, y, z'
' x, -y, 1/2+z'
'-x, -y, 1/2+z'
'-x, -y, -z'
' x, -y, -z'
'-x, y, 1/2-z'
' x, y, 1/2-z'
' 1/2+x, 1/2+y, z'
' 1/2-x, 1/2+y, z'
' 1/2+x, 1/2-y, 1/2+z'
' 1/2-x, 1/2-y, 1/2+z'
' 1/2-x, 1/2-y, -z'
' 1/2+x, 1/2-y, -z'
' 1/2-x, 1/2+y, 1/2-z'
' 1/2+x, 1/2+y, 1/2-z'

_symmetry_cell_setting            orthorhombic
_symmetry_space_group_name_H-M    'C m c m'

_cell_length_a                    3.829(1)
_cell_length_b                    12.245(5)
_cell_length_c                    9.077(3)
_cell_angle_alpha                 90
_cell_angle_beta                  90
_cell_angle_gamma                 90
_cell_volume                      425.7(4)
_cell_formula_units_Z              4


#------------------ CRYSTAL INFORMATION -------------------------------------#

_pd_spec_size_axial               25 # mm
_pd_spec_size_equat               25 # mm
_pd_spec_size_thick               1  # mm

_pd_spec_mounting                 'packed powder pellet'
_pd_spec_mount_mode               ?
_pd_spec_shape                    ?
_pd_char_particle_morphology      ?
_pd_char_colour                   ?

#_pd_prep_conditions               ?
#_pd_prep_cool_rate                ? # K/min
#_pd_prep_pressure                 '19 200 000 kPa'
#_pd_prep_temperature              '295 K'

_exptl_crystal_density_meas       ?
_exptl_crystal_density_diffrn     9.1996
_exptl_crystal_density_method     ?
_exptl_crystal_F_000              968
_exptl_absorpt_coefficient_mu     17.22
_exptl_crystal_description        'black powder'

#------------------ DATA COLLECTION INFORMATION -----------------------------#

_cell_measurement_temperature          295.0
_cell_measurement_reflns_used          ?
_cell_measurement_theta_min            ?
_cell_measurement_theta_max            ?

_diffrn_ambient_temperature            295.0
_diffrn_measurement_device_type        'ID09 ESRF'
_diffrn_source_power                   ?
_diffrn_source_voltage                 ?
_diffrn_source_current                 ?
_diffrn_radiation_source               'synchrotron ESRF'
_diffrn_radiation_detector             ?
_diffrn_radiation_monochromator   ?
_diffrn_radiation_probe           x-ray

_diffrn_radiation_wavelength      0.413121
_diffrn_radiation_type            synchrotron

_diffrn_reflns_number             ?

_diffrn_reflns_limit_h_min           0
_diffrn_reflns_limit_h_max           4
_diffrn_reflns_limit_k_min           0
_diffrn_reflns_limit_k_max           12
_diffrn_reflns_limit_l_min           0
_diffrn_reflns_limit_l_max           9
_diffrn_reflns_theta_min          ?
_diffrn_reflns_theta_max          12.2


#------------------ COMPUTER PROGRAMS USED ----------------------------------#

_computing_data_collection        ?
_computing_cell_refinement        'WinCSD'
_computing_data_reduction         'WinCSD'
_computing_structure_solution     'WinCSD'
_computing_structure_refinement   'WinCSD'
_computing_molecular_graphics     ?
_computing_publication_material   'WinCSD (Akselrud et al, 1993)'

#### PLEASE do not forget the following reference :
#L. Akselrud, Yu. Grin.
#WinCSD: software package for crystallographic calculations (Version 4).
#J. Appl. Crystallogr., 2014, 47.

#------------------ REFINEMENT INFORMATION ----------------------------------#

# Use this field to give any special details about
# about the processing of the powder pattern
_pd_proc_ls_special_details
; ?
;

# The next two items are given as text
_pd_proc_ls_profile_function      pseudo-Voigt
_pd_proc_ls_pref_orient_corr
; Preffered orientation was refined using WinCSD
formula (Pecharskii, Akselrud & Zavalii, 1987):

I~corr~=I~obs~/[1+(\t^2^-1)^.^sin^2^\f]^1/2^

'Axis'  1  0  0, \t=0.48(2)

;

#------------------------- EXPERIMENTAL DATA --------------------------------#
_pd_meas_scan_method               step
_pd_meas_2theta_range_min         2.01
_pd_meas_2theta_range_max         24.0
_pd_meas_2theta_range_inc         0.01
 
#------------------------- REFINEMENT INFORMATION ---------------------------#
 
_pd_proc_ls_prof_R_factor         0.0197
_pd_proc_ls_prof_wR_factor        0.0326
_pd_proc_ls_prof_wR_expected      0.0209

_refine_ls_structure_factor_coef  Inet
_refine_ls_matrix_type            fullcycle

_refine_ls_weighting_scheme       'calc'
_refine_ls_weighting_details      '1/[Y~i~+\s(Y~i~)]'
_refine_ls_hydrogen_treatment     ?
_refine_ls_extinction_method      ?
_refine_ls_extinction_coef        ?
_refine_ls_abs_structure_details  ?
_refine_ls_abs_structure_Flack    ?
_refine_ls_number_reflns          148
_refine_ls_number_parameters      6
_refine_ls_number_restraints      ?
_refine_ls_number_constraints     ?
_refine_ls_restrained_S_all       ?
_refine_ls_restrained_S_obs       ?
_refine_ls_shift/su_max           ?
_refine_ls_shift/su_mean          ?

_refine_diff_density_max          ?
_refine_diff_density_min          ?

#------------------ ATOMIC TYPES, COORDINATES AND THERMAL PARAMETERS --------#

loop_
_atom_site_label
_atom_site_type_symbol
_atom_site_fract_x
_atom_site_fract_y
_atom_site_fract_z
_atom_site_thermal_displace_type
_atom_site_B_iso_or_equiv
_atom_site_symmetry_multiplicity
_atom_site_occupancy
Bi   Bi  0          0.7401(10) 0.25       Bovl 0.74      4         1.0
I1   I   0          0.051(2)   0.25       Bovl 0.74      4         1.0
I2   I   0          0.6290(8)  0.561(1)   Bovl 0.74      8         1.0


loop_
_geom_bond_atom_site_label_1
_geom_bond_atom_site_label_2
_geom_bond_distance
_geom_bond_site_symmetry_2
_geom_bond_publ_flag
Bi      I1       2.997(15)    9_555   yes
Bi      I1       2.997(15)    9_455   yes
Bi      I2       3.028(10)   11_564   yes
Bi      I2       3.028(10)   11_464   yes
Bi      I2       3.028(10)   13_566   yes
Bi      I2       3.028(10)   13_466   yes
Bi      I2       3.136(12)     .      yes
Bi      I2       3.136(12)    7_555   yes
Bi      I1       3.82(2)      1_565   yes
Bi      Bi       3.830(1)     1_655   yes
Bi      Bi       3.830(1)     1_455   yes
I1      I2       3.393(13)   11_554   yes
I1      I2       3.393(13)   11_454   yes
I1      I2       3.393(13)   13_556   yes
I1      I2       3.393(13)   13_456   yes
I1      I2       3.541(10)    9_545   yes
I1      I2       3.541(10)    9_445   yes
I1      I2       3.541(10)   15_545   yes
I1      I2       3.541(10)   15_445   yes
I1      I1       3.830(1)     1_455   yes
I1      I1       3.830(1)     1_655   yes
I1      I2       4.27(2)      3_564   yes
I1      I2       4.27(2)      5_566   yes
I2      I2       3.349(14)    5_566   yes
I2      I2       3.427(15)    7_556   yes
I2      I2       3.699(12)   13_566   yes
I2      I2       3.699(12)   13_466   yes
I2      I2       3.830(1)     1_655   yes
I2      I2       3.830(1)     1_455   yes

loop_
_geom_angle_atom_site_label_1
_geom_angle_atom_site_label_2
_geom_angle_atom_site_label_3
_geom_angle
_geom_angle_site_symmetry_1
_geom_angle_site_symmetry_2
_geom_angle_site_symmetry_3
_geom_angle_publ_flag
I1      Bi      I1        79.41(3)    9_555    .      9_455  yes
I1      Bi      I2        90.17(3)    9_555    .     11_564  yes
I1      Bi      I2       144.19(4)    9_555    .     11_464  yes
I1      Bi      I2        90.17(3)    9_555    .     13_566  yes
I1      Bi      I2       144.19(4)    9_555    .     13_466  yes
I1      Bi      I2        70.49(3)    9_555    .       .     yes
I1      Bi      I2        70.49(3)    9_555    .      7_555  yes
I1      Bi      I1       140.29(3)    9_555    .      1_565  yes
I1      Bi      Bi        50.29(2)    9_555    .      1_655  yes
I1      Bi      Bi       129.71(3)    9_555    .      1_455  yes
I1      Bi      I2       144.19(4)    9_455    .     11_564  yes
I1      Bi      I2        90.17(3)    9_455    .     11_464  yes
I1      Bi      I2       144.19(4)    9_455    .     13_566  yes
I1      Bi      I2        90.17(3)    9_455    .     13_466  yes
I1      Bi      I2        70.49(3)    9_455    .       .     yes
I1      Bi      I2        70.49(3)    9_455    .      7_555  yes
I1      Bi      I1       140.29(3)    9_455    .      1_565  yes
I1      Bi      Bi       129.71(3)    9_455    .      1_655  yes
I1      Bi      Bi        50.29(2)    9_455    .      1_455  yes
I2      Bi      I2        78.45(3)   11_564    .     11_464  yes
I2      Bi      I2        68.93(3)   11_564    .     13_566  yes
I2      Bi      I2       116.13(3)   11_564    .     13_466  yes
I2      Bi      I2       137.68(3)   11_564    .       .     yes
I2      Bi      I2        73.73(3)   11_564    .      7_555  yes
I2      Bi      I1        58.06(3)   11_564    .      1_565  yes
I2      Bi      Bi        50.77(2)   11_564    .      1_655  yes
I2      Bi      Bi       129.23(3)   11_564    .      1_455  yes
I2      Bi      I2       116.13(3)   11_464    .     13_566  yes
I2      Bi      I2        68.93(3)   11_464    .     13_466  yes
I2      Bi      I2       137.68(3)   11_464    .       .     yes
I2      Bi      I2        73.73(3)   11_464    .      7_555  yes
I2      Bi      I1        58.06(3)   11_464    .      1_565  yes
I2      Bi      Bi       129.23(3)   11_464    .      1_655  yes
I2      Bi      Bi        50.77(2)   11_464    .      1_455  yes
I2      Bi      I2        78.45(3)   13_566    .     13_466  yes
I2      Bi      I2        73.73(3)   13_566    .       .     yes
I2      Bi      I2       137.68(3)   13_566    .      7_555  yes
I2      Bi      I1        58.06(3)   13_566    .      1_565  yes
I2      Bi      Bi        50.77(2)   13_566    .      1_655  yes
I2      Bi      Bi       129.23(3)   13_566    .      1_455  yes
I2      Bi      I2        73.73(3)   13_466    .       .     yes
I2      Bi      I2       137.68(3)   13_466    .      7_555  yes
I2      Bi      I1        58.06(3)   13_466    .      1_565  yes
I2      Bi      Bi       129.23(3)   13_466    .      1_655  yes
I2      Bi      Bi        50.77(2)   13_466    .      1_455  yes
I2      Bi      I2       128.55(3)     .       .      7_555  yes
I2      Bi      I1       115.73(3)     .       .      1_565  yes
I2      Bi      Bi        90.00(3)     .       .      1_655  yes
I2      Bi      Bi        90.00(3)     .       .      1_455  yes
I2      Bi      I1       115.73(3)    7_555    .      1_565  yes
I2      Bi      Bi        90.00(3)    7_555    .      1_655  yes
I2      Bi      Bi        90.00(3)    7_555    .      1_455  yes
I1      Bi      Bi        90.00(2)    1_565    .      1_655  yes
I1      Bi      Bi        90.00(2)    1_565    .      1_455  yes
Bi      Bi      Bi       180.00(3)    1_655    .      1_455  yes
Bi      I1      Bi        79.41(3)    9_545    .      9_445  yes
Bi      I1      I2        98.14(3)    9_545    .     11_554  yes
Bi      I1      I2       149.64(4)    9_545    .     11_454  yes
Bi      I1      I2        98.14(3)    9_545    .     13_556  yes
Bi      I1      I2       149.64(4)    9_545    .     13_456  yes
Bi      I1      I2        56.58(3)    9_545    .      9_545  yes
Bi      I1      I2        98.06(3)    9_545    .      9_445  yes
Bi      I1      I2        56.58(3)    9_545    .     15_545  yes
Bi      I1      I2        98.06(3)    9_545    .     15_445  yes
Bi      I1      Bi       140.29(4)    9_545    .      1_545  yes
Bi      I1      I1       129.71(4)    9_545    .      1_455  yes
Bi      I1      I1        50.29(2)    9_545    .      1_655  yes
Bi      I1      I2        45.21(2)    9_545    .      3_564  yes
Bi      I1      I2        45.21(2)    9_545    .      5_566  yes
Bi      I1      I2       149.64(4)    9_445    .     11_554  yes
Bi      I1      I2        98.14(3)    9_445    .     11_454  yes
Bi      I1      I2       149.64(4)    9_445    .     13_556  yes
Bi      I1      I2        98.14(3)    9_445    .     13_456  yes
Bi      I1      I2        98.06(3)    9_445    .      9_545  yes
Bi      I1      I2        56.58(3)    9_445    .      9_445  yes
Bi      I1      I2        98.06(3)    9_445    .     15_545  yes
Bi      I1      I2        56.58(3)    9_445    .     15_445  yes
Bi      I1      Bi       140.29(4)    9_445    .      1_545  yes
Bi      I1      I1        50.29(2)    9_445    .      1_455  yes
Bi      I1      I1       129.71(4)    9_445    .      1_655  yes
Bi      I1      I2        45.21(2)    9_445    .      3_564  yes
Bi      I1      I2        45.21(2)    9_445    .      5_566  yes
I2      I1      I2        68.73(3)   11_554    .     11_454  yes
I2      I1      I2        60.68(3)   11_554    .     13_556  yes
I2      I1      I2        98.49(3)   11_554    .     13_456  yes
I2      I1      I2       105.78(3)   11_554    .      9_545  yes
I2      I1      I2       151.93(4)   11_554    .      9_445  yes
I2      I1      I2        57.72(3)   11_554    .     15_545  yes
I2      I1      I2        94.38(3)   11_554    .     15_445  yes
I2      I1      Bi        49.24(2)   11_554    .      1_545  yes
I2      I1      I1       124.37(3)   11_554    .      1_455  yes
I2      I1      I1        55.63(3)   11_554    .      1_655  yes
I2      I1      I2       113.27(3)   11_554    .      3_564  yes
I2      I1      I2       143.20(3)   11_554    .      5_566  yes
I2      I1      I2        98.49(3)   11_454    .     13_556  yes
I2      I1      I2        60.68(3)   11_454    .     13_456  yes
I2      I1      I2       151.93(4)   11_454    .      9_545  yes
I2      I1      I2       105.78(3)   11_454    .      9_445  yes
I2      I1      I2        94.38(3)   11_454    .     15_545  yes
I2      I1      I2        57.72(3)   11_454    .     15_445  yes
I2      I1      Bi        49.24(2)   11_454    .      1_545  yes
I2      I1      I1        55.63(3)   11_454    .      1_455  yes
I2      I1      I1       124.37(3)   11_454    .      1_655  yes
I2      I1      I2       113.27(3)   11_454    .      3_564  yes
I2      I1      I2       143.20(3)   11_454    .      5_566  yes
I2      I1      I2        68.73(3)   13_556    .     13_456  yes
I2      I1      I2        57.72(3)   13_556    .      9_545  yes
I2      I1      I2        94.38(3)   13_556    .      9_445  yes
I2      I1      I2       105.78(3)   13_556    .     15_545  yes
I2      I1      I2       151.93(4)   13_556    .     15_445  yes
I2      I1      Bi        49.24(2)   13_556    .      1_545  yes
I2      I1      I1       124.37(3)   13_556    .      1_455  yes
I2      I1      I1        55.63(3)   13_556    .      1_655  yes
I2      I1      I2       143.20(3)   13_556    .      3_564  yes
I2      I1      I2       113.27(3)   13_556    .      5_566  yes
I2      I1      I2        94.38(3)   13_456    .      9_545  yes
I2      I1      I2        57.72(3)   13_456    .      9_445  yes
I2      I1      I2       151.93(4)   13_456    .     15_545  yes
I2      I1      I2       105.78(3)   13_456    .     15_445  yes
I2      I1      Bi        49.24(2)   13_456    .      1_545  yes
I2      I1      I1        55.63(3)   13_456    .      1_455  yes
I2      I1      I1       124.37(3)   13_456    .      1_655  yes
I2      I1      I2       143.20(3)   13_456    .      3_564  yes
I2      I1      I2       113.27(3)   13_456    .      5_566  yes
I2      I1      I2        65.47(3)    9_545    .      9_445  yes
I2      I1      I2       105.83(3)    9_545    .     15_545  yes
I2      I1      I2       149.05(4)    9_545    .     15_445  yes
I2      I1      Bi       105.47(3)    9_545    .      1_545  yes
I2      I1      I1       122.73(3)    9_545    .      1_455  yes
I2      I1      I1        57.27(3)    9_545    .      1_655  yes
I2      I1      I2        94.36(3)    9_545    .      3_564  yes
I2      I1      I2        55.62(2)    9_545    .      5_566  yes
I2      I1      I2       149.05(4)    9_445    .     15_545  yes
I2      I1      I2       105.83(3)    9_445    .     15_445  yes
I2      I1      Bi       105.47(3)    9_445    .      1_545  yes
I2      I1      I1        57.27(3)    9_445    .      1_455  yes
I2      I1      I1       122.73(3)    9_445    .      1_655  yes
I2      I1      I2        94.36(3)    9_445    .      3_564  yes
I2      I1      I2        55.62(2)    9_445    .      5_566  yes
I2      I1      I2        65.47(3)   15_545    .     15_445  yes
I2      I1      Bi       105.47(3)   15_545    .      1_545  yes
I2      I1      I1       122.73(3)   15_545    .      1_455  yes
I2      I1      I1        57.27(3)   15_545    .      1_655  yes
I2      I1      I2        55.62(2)   15_545    .      3_564  yes
I2      I1      I2        94.36(3)   15_545    .      5_566  yes
I2      I1      Bi       105.47(3)   15_445    .      1_545  yes
I2      I1      I1        57.27(3)   15_445    .      1_455  yes
I2      I1      I1       122.73(3)   15_445    .      1_655  yes
I2      I1      I2        55.62(2)   15_445    .      3_564  yes
I2      I1      I2        94.36(3)   15_445    .      5_566  yes
Bi      I1      I1        90.00(3)    1_545    .      1_455  yes
Bi      I1      I1        90.00(3)    1_545    .      1_655  yes
Bi      I1      I2       156.32(3)    1_545    .      3_564  yes
Bi      I1      I2       156.32(3)    1_545    .      5_566  yes
I1      I1      I1       180.00(4)    1_455    .      1_655  yes
I1      I1      I2        90.00(3)    1_455    .      3_564  yes
I1      I1      I2        90.00(3)    1_455    .      5_566  yes
I1      I1      I2        90.00(3)    1_655    .      3_564  yes
I1      I1      I2        90.00(3)    1_655    .      5_566  yes
I2      I1      I2        47.36(2)    3_564    .      5_566  yes
Bi      I2      Bi        78.45(3)   11_565    .     11_465  yes
Bi      I2      Bi       106.27(3)   11_565    .       .     yes
Bi      I2      I2       133.38(4)   11_565    .      5_566  yes
Bi      I2      I1        72.69(3)   11_565    .     11_555  yes
Bi      I2      I1       114.61(3)   11_565    .     11_455  yes
Bi      I2      I2        55.53(2)   11_565    .      7_556  yes
Bi      I2      I1       104.51(3)   11_565    .      9_555  yes
Bi      I2      I1       159.16(4)   11_565    .      9_455  yes
Bi      I2      I2        54.47(2)   11_565    .     13_566  yes
Bi      I2      I2        94.23(3)   11_565    .     13_466  yes
Bi      I2      I2        50.77(2)   11_565    .      1_655  yes
Bi      I2      I2       129.23(3)   11_565    .      1_455  yes
Bi      I2      I1        44.62(2)   11_565    .      3_565  yes
Bi      I2      Bi       106.27(3)   11_465    .       .     yes
Bi      I2      I2       133.38(4)   11_465    .      5_566  yes
Bi      I2      I1       114.61(3)   11_465    .     11_555  yes
Bi      I2      I1        72.69(3)   11_465    .     11_455  yes
Bi      I2      I2        55.53(2)   11_465    .      7_556  yes
Bi      I2      I1       159.16(4)   11_465    .      9_555  yes
Bi      I2      I1       104.51(3)   11_465    .      9_455  yes
Bi      I2      I2        94.23(3)   11_465    .     13_566  yes
Bi      I2      I2        54.47(2)   11_465    .     13_466  yes
Bi      I2      I2       129.23(3)   11_465    .      1_655  yes
Bi      I2      I2        50.77(2)   11_465    .      1_455  yes
Bi      I2      I1        44.62(2)   11_465    .      3_565  yes
Bi      I2      I2        96.35(3)     .       .      5_566  yes
Bi      I2      I1       137.60(4)     .       .     11_555  yes
Bi      I2      I1       137.60(4)     .       .     11_455  yes
Bi      I2      I2       154.27(4)     .       .      7_556  yes
Bi      I2      I1        52.92(2)     .       .      9_555  yes
Bi      I2      I1        52.92(2)     .       .      9_455  yes
Bi      I2      I2        51.80(2)     .       .     13_566  yes
Bi      I2      I2        51.80(2)     .       .     13_466  yes
Bi      I2      I2        90.00(3)     .       .      1_655  yes
Bi      I2      I2        90.00(3)     .       .      1_455  yes
Bi      I2      I1        87.95(3)     .       .      3_565  yes
I2      I2      I1        63.37(3)    5_566    .     11_555  yes
I2      I2      I1        63.37(3)    5_566    .     11_455  yes
I2      I2      I2       109.38(3)    5_566    .      7_556  yes
I2      I2      I1        58.91(3)    5_566    .      9_555  yes
I2      I2      I1        58.91(3)    5_566    .      9_455  yes
I2      I2      I2       130.99(3)    5_566    .     13_566  yes
I2      I2      I2       130.99(3)    5_566    .     13_466  yes
I2      I2      I2        90.00(3)    5_566    .      1_655  yes
I2      I2      I2        90.00(3)    5_566    .      1_455  yes
I2      I2      I1       175.70(3)    5_566    .      3_565  yes
I1      I2      I1        68.73(3)   11_555    .     11_455  yes
I1      I2      I2        59.66(3)   11_555    .      7_556  yes
I1      I2      I1        85.62(3)   11_555    .      9_555  yes
I1      I2      I1       122.28(3)   11_555    .      9_455  yes
I1      I2      I2       112.49(3)   11_555    .     13_566  yes
I1      I2      I2       165.23(4)   11_555    .     13_466  yes
I1      I2      I2        55.63(2)   11_555    .      1_655  yes
I1      I2      I2       124.37(3)   11_555    .      1_455  yes
I1      I2      I1       113.27(3)   11_555    .      3_565  yes
I1      I2      I2        59.66(3)   11_455    .      7_556  yes
I1      I2      I1       122.28(3)   11_455    .      9_555  yes
I1      I2      I1        85.62(3)   11_455    .      9_455  yes
I1      I2      I2       165.23(4)   11_455    .     13_566  yes
I1      I2      I2       112.49(3)   11_455    .     13_466  yes
I1      I2      I2       124.37(3)   11_455    .      1_655  yes
I1      I2      I2        55.63(2)   11_455    .      1_455  yes
I1      I2      I1       113.27(3)   11_455    .      3_565  yes
I2      I2      I1       142.92(4)    7_556    .      9_555  yes
I2      I2      I1       142.92(4)    7_556    .      9_455  yes
I2      I2      I2       107.48(3)    7_556    .     13_566  yes
I2      I2      I2       107.48(3)    7_556    .     13_466  yes
I2      I2      I2        90.00(3)    7_556    .      1_655  yes
I2      I2      I2        90.00(3)    7_556    .      1_455  yes
I2      I2      I1        66.32(2)    7_556    .      3_565  yes
I1      I2      I1        65.47(3)    9_555    .      9_455  yes
I1      I2      I2        72.19(3)    9_555    .     13_566  yes
I1      I2      I2       104.71(3)    9_555    .     13_466  yes
I1      I2      I2        57.27(2)    9_555    .      1_655  yes
I1      I2      I2       122.73(3)    9_555    .      1_455  yes
I1      I2      I1       124.38(3)    9_555    .      3_565  yes
I1      I2      I2       104.71(3)    9_455    .     13_566  yes
I1      I2      I2        72.19(3)    9_455    .     13_466  yes
I1      I2      I2       122.73(3)    9_455    .      1_655  yes
I1      I2      I2        57.27(2)    9_455    .      1_455  yes
I1      I2      I1       124.38(3)    9_455    .      3_565  yes
I2      I2      I2        62.36(2)   13_566    .     13_466  yes
I2      I2      I2        58.82(2)   13_566    .      1_655  yes
I2      I2      I2       121.18(3)   13_566    .      1_455  yes
I2      I2      I1        52.20(2)   13_566    .      3_565  yes
I2      I2      I2       121.18(3)   13_466    .      1_655  yes
I2      I2      I2        58.82(2)   13_466    .      1_455  yes
I2      I2      I1        52.20(2)   13_466    .      3_565  yes
I2      I2      I2       180.00(3)    1_655    .      1_455  yes
I2      I2      I1        90.00(3)    1_655    .      3_565  yes
I2      I2      I1        90.00(3)    1_455    .      3_565  yes
